# Supplementary material for: Dissociative chemisorption of hydrogen molecules on defective graphene-supported aluminium clusters: a computational study
Source: Royal Society of Chemistry journal article supplement (doi:10.1039/c8cp05711g), 2018-01-01
Supplement: c8cp05711g1.pdf [file c8cp05711g1.pdf]

## Supplementary Information

### Dissociative Chemisorption of Hydrogen Molecule on Defective Graphene Supported Aluminium Clusters: A Computational Study

Deepak Kumar,<sup>a,§</sup> Thillai Govindaraja,<sup>b,§</sup> Sailaja Krishnamurty,<sup>a,\*</sup> Selvaraj Kaliaperumal,<sup>b</sup> and Sourav Pal<sup>c,\*</sup>

<sup>a</sup> Physical Chemistry Division, CSIR-National Chemical Laboratory, Pune 411 008, India

<sup>b</sup> Nano and Computational Material Lab., Catalysis Division, CSIR-National Chemical Laboratory, Pune 411 008, India

<sup>c</sup> IISER Kolkata, Mohanpur 741 246, West Bengal, India

\*Email: [k.sailaja@ncl.res.in](mailto:k.sailaja@ncl.res.in), [s.pal@iiserkol.ac.in](mailto:s.pal@iiserkol.ac.in),

<sup>§</sup>equally contributing authors

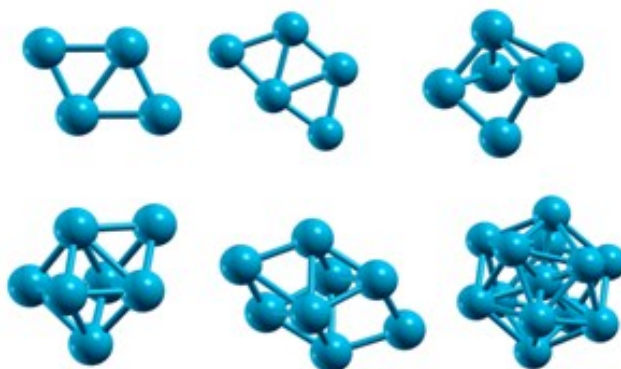

Suppl-Figure 1. The optimized lowest energy conformations of Al<sub>4,8</sub> and Al<sub>13</sub> clusters.

Suppl-Table 1. Interatomic distances in (i) free Al<sub>n</sub> clusters (n = 4, 5), (ii) Al<sub>n</sub> clusters (n = 4, 5) anchored on defective graphene and (iii) H<sub>2</sub> adsorbed on Al<sub>n</sub> (n = 4, 5)--df\_graphene complexes.

| <b>(i)</b>            | <b>d<sub>Al-Al</sub></b><br><b>(Å)</b> | <b>Unsaturated</b><br><b>Carbons</b> | <b>d<sub>C-C</sub></b><br><b>(Å)</b> | <b>(ii)</b>                  | <b>d<sub>Al-Al</sub></b><br><b>(Å)</b> | <b>Unsaturated</b><br><b>Carbons</b> | <b>d<sub>C-C</sub></b><br><b>(Å)</b> | <b>(iii)</b>                               | <b>d<sub>Al-Al</sub></b><br><b>(Å)</b> | <b>Unsaturated</b><br><b>carbons</b> | <b>d<sub>C-C</sub></b><br><b>(Å)</b> |
|-----------------------|----------------------------------------|--------------------------------------|--------------------------------------|------------------------------|----------------------------------------|--------------------------------------|--------------------------------------|--------------------------------------------|----------------------------------------|--------------------------------------|--------------------------------------|
| <b>Al<sub>4</sub></b> | 2.47                                   | C1-C2                                | 2.38                                 | <b>Al<sub>4</sub>--df_gp</b> | 2.61                                   | C1-C2                                | 2.84                                 | <b>H<sub>2</sub>-Al<sub>4</sub>--df_gp</b> | 2.75                                   | C1-C2                                | 2.86                                 |
|                       | 2.67                                   | C2-C3                                | 2.62                                 |                              | 2.77                                   | C2-C3                                | 2.86                                 |                                            | 2.71                                   | C2-C3                                | 2.87                                 |
|                       | 2.77                                   | C1-C3                                | 2.60                                 |                              | 2.67                                   | C1-C3                                | 2.84                                 |                                            | 2.55                                   | C1-C3                                | 2.82                                 |
|                       | 2.67                                   |                                      |                                      |                              | 2.88                                   |                                      |                                      |                                            | 2.96                                   |                                      |                                      |
|                       | 2.47                                   |                                      |                                      |                              | 2.72                                   |                                      |                                      |                                            | 2.86                                   |                                      |                                      |
| <b>Al<sub>5</sub></b> | 2.49                                   | C1-C2                                | 2.38                                 | <b>Al<sub>5</sub>--df_gp</b> | 2.50                                   | C1-C2                                | 2.84                                 | <b>H<sub>2</sub>-Al<sub>5</sub>--df_gp</b> | 2.50                                   | C1-C2                                | 2.83                                 |
|                       | 2.52                                   | C2-C3                                | 2.62                                 |                              | 2.58                                   | C2-C3                                | 2.87                                 |                                            | 2.54                                   | C2-C3                                | 2.85                                 |
|                       | 2.52                                   | C1-C3                                | 2.60                                 |                              | 2.63                                   | C1-C3                                | 2.87                                 |                                            | 2.65                                   | C1-C3                                | 2.86                                 |
|                       | 2.62                                   |                                      |                                      |                              | 2.70                                   |                                      |                                      |                                            | 2.78                                   |                                      |                                      |
|                       | 2.62                                   |                                      |                                      |                              | 2.52                                   |                                      |                                      |                                            | 2.55                                   |                                      |                                      |
|                       | 2.78                                   |                                      |                                      |                              | 2.80                                   |                                      |                                      |                                            | 2.84                                   |                                      |                                      |
|                       | 2.76                                   |                                      |                                      |                              | 2.68                                   |                                      |                                      |                                            | 2.58                                   |                                      |                                      |

Suppl-Table 2. Charge distribution on various Al atoms of (a) free  $Al_n$  clusters and (b)  $Al_n$  – defective\_graphene complexes as obtained by Bader analysis. Defective graphene is abbreviated as df\_gp in the table.

| $Al_4$<br>(e) | $Al_4$ --df_gp<br>(e) | $Al_5$<br>(e) | $Al_5$ --df_gp<br>(e) | $Al_6$<br>(e) | $Al_6$ --df_gp<br>(e) | $Al_7$<br>(e) | $Al_7$ --df_gp<br>(e) | $Al_8$<br>(e) | $Al_8$ --df_gp<br>(e) | $Al_{13}$<br>(e) | $Al_{13}$ --df_gp<br>(e) |
|---------------|-----------------------|---------------|-----------------------|---------------|-----------------------|---------------|-----------------------|---------------|-----------------------|------------------|--------------------------|
| -0.13         | 1.65                  | -0.23         | 1.95                  | 0.06          | 1.65                  | -0.01         | 1.61                  | 0.04          | 1.83                  | -1.14            | 1.88                     |
| 0.14          | 0.63                  | 0.15          | 0.41                  | -0.12         | 0.55                  | 0.04          | -0.04                 | -0.08         | -0.35                 | 0.12             | 0.56                     |
| -0.14         | 0.35                  | -0.06         | 0.04                  | 0.09          | 0.10                  | -0.03         | 0.40                  | 0.05          | 0.12                  | 0.09             | 0.17                     |
| 0.13          | 0.53                  | -0.02         | -0.18                 | 0.07          | 0.09                  | -0.02         | 0.15                  | -0.05         | 0.22                  | 0.10             | -0.25                    |
|               |                       | 0.16          | 0.14                  | -0.08         | 0.56                  | 0.00          | 0.06                  | -0.19         | 0.12                  | 0.08             | 0.11                     |
|               |                       |               |                       | 0.00          | 0.02                  | -0.01         | 0.07                  | -0.15         | 0.08                  | 0.11             | -0.18                    |
|               |                       |               |                       |               |                       | 0.03          | 0.00                  | 0.20          | 0.50                  | 0.10             | 0.11                     |
|               |                       |               |                       |               |                       |               |                       | 0.17          | 0.49                  | 0.09             | -0.49                    |
|               |                       |               |                       |               |                       |               |                       |               |                       | 0.09             | 0.18                     |
|               |                       |               |                       |               |                       |               |                       |               |                       | 0.10             | 0.01                     |
|               |                       |               |                       |               |                       |               |                       |               |                       | 0.08             | 0.13                     |
|               |                       |               |                       |               |                       |               |                       |               |                       | 0.11             | 0.39                     |
|               |                       |               |                       |               |                       |               |                       |               |                       | 0.08             | 0.18                     |

Suppl-Table 3. Charge distribution on unsaturated carbon centres in Al<sub>n</sub>- defective\_graphene complexes as obtained by Bader analysis. Defective graphene is abbreviated as df\_gp in the table.

| <b>System</b>                                   |                     | <b>Al<sub>4</sub></b><br>(e) | <b>Al<sub>5</sub></b><br>(e) | <b>Al<sub>6</sub></b><br>(e) | <b>Al<sub>7</sub></b><br>(e) | <b>Al<sub>8</sub></b><br>(e) | <b>Al<sub>13</sub></b><br>(e) |
|-------------------------------------------------|---------------------|------------------------------|------------------------------|------------------------------|------------------------------|------------------------------|-------------------------------|
| Net charge on defective_graphene                |                     | -3.16                        | -2.36                        | -2.97                        | -2.25                        | -3.01                        | -2.79                         |
| Net charge on Al cluster                        |                     | 3.16                         | 2.36                         | 2.97                         | 2.25                         | 3.01                         | 2.79                          |
| <b>Charge redistribution at defective sites</b> | <b>df_gp</b><br>(e) | <b>Al4--df_gp</b><br>(e)     | <b>Al5--df_gp</b><br>(e)     | <b>Al6--df_gp</b><br>(e)     | <b>Al7--df_gp</b><br>(e)     | <b>Al8--df_gp</b><br>(e)     | <b>Al13--df_gp</b><br>(e)     |
| <b>C1</b>                                       | -0.13               | -0.76                        | -0.5                         | -0.6                         | -0.06                        | -0.97                        | -0.43                         |
| <b>C2</b>                                       | 0.08                | -0.31                        | -0.48                        | -1.06                        | -0.43                        | -0.47                        | -0.56                         |
| <b>C3</b>                                       | 0.05                | -0.93                        | -1.02                        | -1.06                        | -0.9                         | -0.96                        | -0.99                         |
| <b>Sum of charges on defective sites</b>        |                     | <b>-2.0</b>                  | <b>-2.0</b>                  | <b>-2.72</b>                 | <b>-1.39</b>                 | <b>-2.4</b>                  | <b>-1.98</b>                  |

Suppl-Table 4. Charge distribution on unsaturated carbon centers in Al<sub>n</sub> supported defective graphene before and after H<sub>2</sub> adsorption. Defective graphene is abbreviated as df\_gp in the table.

| Carbon site                              | Al <sub>4</sub> --df_gp |       | Al <sub>5</sub> --df_gp |       | Al <sub>6</sub> --df_gp |       | Al <sub>7</sub> --df_gp |       | Al <sub>8</sub> --df_gp |       | Al <sub>13</sub> --df_gp |       |
|------------------------------------------|-------------------------|-------|-------------------------|-------|-------------------------|-------|-------------------------|-------|-------------------------|-------|--------------------------|-------|
|                                          | (e)                     |       | (e)                     |       | (e)                     |       | (e)                     |       | (e)                     |       | (e)                      |       |
|                                          | (i)                     | (ii)  | (i)                      | (ii)  |
| <b>C1</b>                                | -0.76                   | -0.89 | -0.5                    | -0.48 | -0.6                    | -0.56 | -0.06                   | -0.51 | -0.97                   | -1.04 | -0.43                    | -1.02 |
| <b>C2</b>                                | -0.31                   | -0.58 | -0.48                   | -0.63 | -1.06                   | -1.04 | -0.43                   | -0.48 | -0.47                   | -0.61 | -0.56                    | -0.42 |
| <b>C3</b>                                | -0.93                   | -0.9  | -1.02                   | -1.03 | -1.06                   | -1.02 | -0.9                    | -0.92 | -0.96                   | -0.93 | -0.99                    | -1.09 |
| <b>Sum of charges on defective sites</b> | -2                      | -2.37 | -2                      | -2.14 | -2.72                   | -2.62 | -1.39                   | -1.91 | -2.4                    | -2.58 | -1.98                    | -2.53 |

(i) – before H<sub>2</sub> adsorption, (ii) – after H<sub>2</sub> adsorption

## Cartesian coordinates of the optimized structures

| Def_graphene |          |           |          |
|--------------|----------|-----------|----------|
| C            | 9.926615 | 17.354302 | 3.505298 |
| C            | 9.213081 | 16.121569 | 3.626027 |
| C            | 9.933274 | 14.885349 | 3.685142 |
| C            | 9.220017 | 13.651414 | 3.771192 |
| C            | 9.916752 | 12.404806 | 3.802755 |
| C            | 9.196335 | 11.165372 | 3.863027 |
| C            | 9.902038 | 9.926615  | 3.858083 |
| C            | 9.169431 | 8.704186  | 3.908235 |
| C            | 9.902830 | 7.457847  | 3.954193 |
| C            | 9.202994 | 6.219690  | 4.047226 |
| C            | 7.770722 | 6.232729  | 4.134426 |
| C            | 7.061748 | 4.991590  | 4.240328 |
| C            | 5.633086 | 4.983870  | 4.294984 |
| C            | 4.916174 | 3.743442  | 4.350227 |
| C            | 3.487126 | 3.739731  | 4.376181 |
| C            | 2.773765 | 2.500769  | 4.406902 |
| C            | 1.341769 | 2.509282  | 4.428540 |
| C            | 0.628219 | 1.274200  | 4.496344 |
| C            | 0.620385 | 3.746510  | 4.404949 |
| C            | 1.338537 | 4.982850  | 4.374949 |
| C            | 0.628781 | 6.223608  | 4.348315 |
| C            | 1.346210 | 7.464591  | 4.299513 |
| C            | 0.641134 | 8.706579  | 4.238412 |
| C            | 1.364969 | 9.939864  | 4.132606 |
| C            | 0.638959 | 11.174417 | 4.038009 |
| C            | 1.362085 | 12.398777 | 3.943815 |
| C            | 2.807358 | 12.385198 | 3.900158 |
| C            | 3.500467 | 13.630289 | 3.845160 |
| C            | 4.925841 | 13.636862 | 3.852116 |
| C            | 5.640719 | 14.878885 | 3.794206 |
| C            | 7.068246 | 14.896602 | 3.765345 |
| C            | 7.782496 | 16.129392 | 3.679560 |
| C            | 2.775168 | 7.452083  | 4.323377 |
| C            | 3.485145 | 6.216576  | 4.352460 |
| C            | 2.768749 | 4.976691  | 4.367059 |
| C            | 4.910368 | 6.215392  | 4.318578 |
| C            | 7.051831 | 7.461732  | 4.125028 |
| C            | 7.702052 | 8.723717  | 3.940437 |
| C            | 7.031912 | 9.980457  | 3.868547 |
| C            | 7.750001 | 11.182656 | 3.902951 |
| C            | 7.790332 | 13.661997 | 3.805306 |
| C            | 7.085262 | 12.441883 | 3.874176 |
| C            | 5.663105 | 12.393472 | 3.891606 |
| C            | 4.978488 | 11.173919 | 3.847358 |
| C            | 3.556883 | 11.122505 | 3.935771 |
| C            | 2.789265 | 9.929657  | 4.128239 |
| C            | 3.504806 | 8.705300  | 4.306144 |
| C            | 4.886453 | 8.632452  | 4.472915 |
| C            | 5.633439 | 7.470903  | 4.298613 |

v\_gp\_al4

|    |          |           |          |
|----|----------|-----------|----------|
| C  | 9.921506 | 17.340285 | 3.446761 |
| C  | 9.208257 | 16.105962 | 3.541549 |
| C  | 9.921105 | 14.871302 | 3.566720 |
| C  | 9.207813 | 13.638197 | 3.674008 |
| C  | 9.927563 | 12.400518 | 3.648600 |
| C  | 9.229246 | 11.169210 | 3.807040 |
| C  | 9.926825 | 9.919316  | 3.767375 |
| C  | 9.225983 | 8.676805  | 3.937678 |
| C  | 9.925082 | 7.438812  | 3.884730 |
| C  | 9.207578 | 6.207284  | 4.034736 |
| C  | 7.782133 | 6.215187  | 4.191649 |
| C  | 7.067148 | 4.976388  | 4.152104 |
| C  | 5.633846 | 4.968705  | 4.118137 |
| C  | 4.915232 | 3.739052  | 4.115690 |
| C  | 3.482092 | 3.740773  | 4.107301 |
| C  | 2.766159 | 2.506993  | 4.186894 |
| C  | 1.337796 | 2.506127  | 4.217821 |
| C  | 0.623763 | 1.271269  | 4.340788 |
| C  | 0.626158 | 3.743927  | 4.191971 |
| C  | 1.338394 | 4.981183  | 4.109556 |
| C  | 0.629069 | 6.219257  | 4.115919 |
| C  | 1.337790 | 7.459663  | 4.111128 |
| C  | 0.632001 | 8.696828  | 4.124090 |
| C  | 1.358151 | 9.938360  | 4.137119 |
| C  | 0.631953 | 11.172877 | 3.995829 |
| C  | 1.334898 | 12.407845 | 3.853668 |
| C  | 2.757526 | 12.422569 | 3.903263 |
| C  | 3.479028 | 13.650780 | 3.745195 |
| C  | 4.912466 | 13.665662 | 3.801585 |
| C  | 5.631302 | 14.882641 | 3.637821 |
| C  | 7.063457 | 14.875852 | 3.666818 |
| C  | 7.781823 | 16.108402 | 3.566808 |
| C  | 2.762175 | 7.452726  | 4.184134 |
| C  | 3.482880 | 6.210845  | 4.140992 |
| C  | 2.768526 | 4.975980  | 4.087749 |
| C  | 4.916751 | 6.194783  | 4.184568 |
| C  | 7.082210 | 7.451964  | 4.421952 |
| C  | 7.850874 | 8.695384  | 4.335762 |
| C  | 7.278492 | 9.960391  | 4.662981 |
| C  | 7.847666 | 11.188316 | 4.192715 |
| C  | 7.778580 | 13.645196 | 3.817775 |
| C  | 7.076509 | 12.437552 | 4.160514 |
| C  | 5.601535 | 12.477499 | 4.189750 |
| C  | 4.824232 | 11.385095 | 4.608477 |
| C  | 3.463287 | 11.238874 | 4.282935 |
| C  | 2.770706 | 9.948654  | 4.342785 |
| C  | 3.459202 | 8.672482  | 4.453754 |
| C  | 4.823891 | 8.537439  | 4.869658 |
| C  | 5.614756 | 7.411368  | 4.487937 |
| Al | 5.640110 | 10.092807 | 5.747488 |
| Al | 5.212315 | 7.700963  | 6.973086 |
| Al | 7.791359 | 8.988756  | 6.885148 |
| Al | 7.815235 | 11.582989 | 6.583085 |

v\_gp\_al4\_H2

|    |          |           |          |
|----|----------|-----------|----------|
| C  | 5.656056 | 7.361555  | 4.517829 |
| C  | 4.946970 | 6.144120  | 4.241254 |
| C  | 5.662256 | 4.916089  | 4.139679 |
| C  | 7.090814 | 4.916081  | 4.137556 |
| C  | 7.804603 | 6.159286  | 4.141980 |
| C  | 7.109898 | 7.385461  | 4.360084 |
| C  | 7.878933 | 8.624484  | 4.294012 |
| C  | 9.253554 | 8.617173  | 3.901544 |
| C  | 9.951115 | 7.378123  | 3.847396 |
| C  | 9.236181 | 6.147919  | 3.992468 |
| C  | 7.305234 | 9.869278  | 4.655737 |
| C  | 7.882620 | 11.121436 | 4.247927 |
| C  | 9.262594 | 11.114609 | 3.855660 |
| C  | 9.956759 | 9.862907  | 3.772865 |
| C  | 7.098506 | 12.378264 | 4.206604 |
| C  | 7.805604 | 13.591735 | 3.871166 |
| C  | 9.232260 | 13.585421 | 3.725938 |
| C  | 9.956637 | 12.347280 | 3.694929 |
| C  | 7.088831 | 14.820202 | 3.697832 |
| C  | 7.806862 | 16.049698 | 3.572736 |
| C  | 9.233285 | 16.048027 | 3.546453 |
| C  | 9.944873 | 14.817475 | 3.599119 |
| C  | 3.511861 | 6.156622  | 4.207872 |
| C  | 2.795047 | 4.924486  | 4.126326 |
| C  | 3.508931 | 3.686989  | 4.129507 |
| C  | 4.938668 | 3.686920  | 4.138030 |
| C  | 1.367155 | 4.927569  | 4.140148 |
| C  | 0.655433 | 3.689822  | 4.198112 |
| C  | 1.365067 | 2.449043  | 4.211179 |
| C  | 2.793428 | 2.450895  | 4.188658 |
| C  | 2.789356 | 7.398584  | 4.255161 |
| C  | 1.364604 | 7.406658  | 4.163892 |
| C  | 0.655337 | 6.167000  | 4.157185 |
| C  | 3.487629 | 8.618530  | 4.521728 |
| C  | 2.796102 | 9.892212  | 4.372417 |
| C  | 1.382796 | 9.881328  | 4.165729 |
| C  | 0.656547 | 8.642246  | 4.166136 |
| C  | 3.483332 | 11.178560 | 4.270663 |
| C  | 2.780220 | 12.365129 | 3.896769 |
| C  | 1.360661 | 12.351239 | 3.847507 |
| C  | 0.658158 | 11.114092 | 3.998345 |
| C  | 4.845210 | 11.331376 | 4.568007 |
| C  | 5.625838 | 12.421168 | 4.171048 |
| C  | 4.937710 | 13.613846 | 3.799901 |
| C  | 3.505734 | 13.593646 | 3.740000 |
| C  | 5.655846 | 14.831500 | 3.655149 |
| C  | 4.861952 | 8.489192  | 4.933862 |
| C  | 9.947188 | 17.281846 | 3.434061 |
| C  | 0.651240 | 1.213602  | 4.322783 |
| Al | 5.675596 | 10.092804 | 5.710782 |
| Al | 7.691678 | 11.715974 | 6.513012 |
| Al | 7.661832 | 8.987739  | 6.876322 |
| Al | 5.034056 | 7.641392  | 7.034145 |
| H  | 8.495740 | 13.030221 | 6.948246 |
| H  | 8.726839 | 10.360034 | 7.035763 |



v\_gp\_al5

|    |           |           |          |
|----|-----------|-----------|----------|
| C  | 4.978659  | 8.636046  | 4.936776 |
| C  | 5.785204  | 7.510210  | 4.521041 |
| C  | 5.077567  | 6.303470  | 4.223437 |
| C  | 3.640071  | 6.317622  | 4.176825 |
| C  | 2.910635  | 7.556625  | 4.217500 |
| C  | 3.602258  | 8.772652  | 4.515331 |
| C  | 5.791134  | 5.076142  | 4.139930 |
| C  | 7.219498  | 5.082391  | 4.161958 |
| C  | 7.932647  | 6.329300  | 4.191843 |
| C  | 7.237003  | 7.560759  | 4.408482 |
| C  | 8.007354  | 8.807098  | 4.344285 |
| C  | 9.384416  | 8.784679  | 3.964959 |
| C  | 10.081779 | 7.546108  | 3.915132 |
| C  | 9.363183  | 6.317917  | 4.050010 |
| C  | 7.449867  | 10.067887 | 4.634222 |
| C  | 8.003819  | 11.287294 | 4.181835 |
| C  | 9.384461  | 11.274056 | 3.821288 |
| C  | 10.086139 | 10.024504 | 3.795584 |
| C  | 7.231796  | 12.530622 | 4.099672 |
| C  | 7.929359  | 13.736349 | 3.792968 |
| C  | 9.363244  | 13.737660 | 3.664026 |
| C  | 10.081724 | 12.502941 | 3.648241 |
| C  | 7.215738  | 14.979974 | 3.663327 |
| C  | 7.931073  | 16.214227 | 3.575385 |
| C  | 9.361362  | 16.212594 | 3.552358 |
| C  | 10.075918 | 14.973371 | 3.576270 |
| C  | 2.927001  | 5.083984  | 4.119956 |
| C  | 3.641928  | 3.845729  | 4.141369 |
| C  | 5.070692  | 3.845747  | 4.138753 |
| C  | 1.497178  | 5.086175  | 4.136431 |
| C  | 0.784266  | 3.849712  | 4.223637 |
| C  | 1.496667  | 2.610873  | 4.259291 |
| C  | 2.925683  | 2.611217  | 4.227557 |
| C  | 1.491435  | 7.563003  | 4.129798 |
| C  | 0.784731  | 6.324774  | 4.129365 |
| C  | 2.922132  | 10.056379 | 4.398150 |
| C  | 1.508344  | 10.044945 | 4.178895 |
| C  | 0.784237  | 8.804473  | 4.149073 |
| C  | 3.617908  | 11.345388 | 4.334168 |
| C  | 2.912766  | 12.528153 | 3.953826 |
| C  | 1.491594  | 12.515098 | 3.901595 |
| C  | 0.785680  | 11.279481 | 4.035608 |
| C  | 4.987949  | 11.490953 | 4.627267 |
| C  | 5.769313  | 12.579660 | 4.177685 |
| C  | 5.069888  | 13.769873 | 3.816415 |
| C  | 3.636982  | 13.755189 | 3.787060 |
| C  | 5.787538  | 14.987172 | 3.645529 |
| C  | 10.075881 | 17.448675 | 3.469840 |
| C  | 0.783225  | 1.376718  | 4.382743 |
| Al | 5.886024  | 10.209075 | 5.700249 |
| Al | 4.718456  | 8.221977  | 6.962231 |
| Al | 4.782668  | 8.381627  | 9.753373 |
| Al | 5.857518  | 10.181013 | 8.394996 |
| Al | 3.676158  | 6.473284  | 8.539622 |

v\_gp\_al5\_H2

|    |           |           |           |
|----|-----------|-----------|-----------|
| C  | 10.067580 | 17.443058 | 3.450770  |
| C  | 9.353161  | 16.207215 | 3.538899  |
| C  | 7.924097  | 16.208580 | 3.563559  |
| C  | 7.207558  | 14.974532 | 3.653037  |
| C  | 5.779059  | 14.980375 | 3.627746  |
| C  | 5.063204  | 13.761443 | 3.790627  |
| C  | 3.629472  | 13.746916 | 3.754443  |
| C  | 2.904762  | 12.520842 | 3.915725  |
| C  | 1.482629  | 12.509268 | 3.870427  |
| C  | 0.776937  | 11.273759 | 4.007301  |
| C  | 3.612543  | 11.337601 | 4.286408  |
| C  | 2.912925  | 10.051080 | 4.354087  |
| C  | 1.498837  | 10.039116 | 4.140612  |
| C  | 4.982844  | 11.473990 | 4.582131  |
| C  | 5.762604  | 12.571089 | 4.151277  |
| C  | 7.225179  | 12.524187 | 4.090130  |
| C  | 7.922784  | 13.731236 | 3.785199  |
| C  | 9.355200  | 13.732000 | 3.651923  |
| C  | 10.067291 | 14.967785 | 3.558066  |
| C  | 10.070832 | 12.496126 | 3.624060  |
| C  | 9.374110  | 11.267561 | 3.806152  |
| C  | 7.997493  | 11.281528 | 4.182484  |
| C  | 0.774717  | 8.798247  | 4.115992  |
| C  | 3.591940  | 8.766082  | 4.464351  |
| C  | 4.970614  | 8.635945  | 4.889843  |
| C  | 2.897582  | 7.545495  | 4.174823  |
| C  | 1.478940  | 7.553994  | 4.087924  |
| C  | 0.772743  | 6.315933  | 4.092387  |
| C  | 3.629576  | 6.307161  | 4.149766  |
| C  | 2.915884  | 5.073232  | 4.090754  |
| C  | 1.486388  | 5.077883  | 4.104120  |
| C  | 0.774424  | 3.841667  | 4.199213  |
| C  | 2.916582  | 2.601973  | 4.199278  |
| C  | 3.631994  | 3.836809  | 4.113937  |
| C  | 1.487038  | 2.603571  | 4.231151  |
| C  | 0.772214  | 1.370170  | 4.357136  |
| C  | 5.070441  | 6.295163  | 4.202595  |
| C  | 5.782400  | 5.067247  | 4.123282  |
| C  | 5.060257  | 3.837812  | 4.117404  |
| C  | 5.780493  | 7.505546  | 4.485672  |
| C  | 7.227782  | 7.555508  | 4.387878  |
| C  | 7.923990  | 6.322402  | 4.175876  |
| C  | 7.210954  | 5.075429  | 4.147452  |
| C  | 7.439280  | 10.063186 | 4.638659  |
| C  | 7.997335  | 8.805531  | 4.335073  |
| C  | 9.373313  | 8.779878  | 3.947153  |
| C  | 10.076997 | 10.017979 | 3.777216  |
| C  | 10.070916 | 7.540502  | 3.896738  |
| C  | 9.353998  | 6.311203  | 4.034052  |
| Al | 5.862871  | 10.201673 | 5.687255  |
| Al | 4.382844  | 8.114772  | 6.777471  |
| Al | 5.139057  | 10.106507 | 8.232622  |
| Al | 5.529808  | 8.541812  | 10.191647 |
| Al | 3.295330  | 8.103204  | 9.034043  |
| H  | 6.255578  | 10.132288 | 9.541673  |
| H  | 6.288674  | 8.492726  | 11.594321 |



v\_gp\_al6

|    |           |           |          |
|----|-----------|-----------|----------|
| C  | 10.031512 | 17.317288 | 3.581009 |
| C  | 9.317302  | 16.083886 | 3.668680 |
| C  | 10.031500 | 14.847596 | 3.697227 |
| C  | 9.318722  | 13.611631 | 3.791823 |
| C  | 10.038608 | 12.375534 | 3.772349 |
| C  | 9.338382  | 11.145929 | 3.927600 |
| C  | 10.039807 | 9.895437  | 3.890296 |
| C  | 9.338481  | 8.654271  | 4.050041 |
| C  | 10.038716 | 7.415538  | 4.014721 |
| C  | 9.318815  | 6.186909  | 4.150970 |
| C  | 7.888767  | 6.197750  | 4.294090 |
| C  | 7.177194  | 4.951785  | 4.268950 |
| C  | 5.750351  | 4.944304  | 4.252029 |
| C  | 5.028466  | 3.714824  | 4.258454 |
| C  | 3.602353  | 3.715983  | 4.269539 |
| C  | 2.885742  | 2.481237  | 4.368247 |
| C  | 0.742520  | 1.244391  | 4.495447 |
| C  | 1.455529  | 2.481001  | 4.380298 |
| C  | 0.742324  | 3.719542  | 4.334698 |
| C  | 1.455407  | 4.956537  | 4.259247 |
| C  | 0.742433  | 6.198672  | 4.253877 |
| C  | 1.449760  | 7.436929  | 4.257964 |
| C  | 0.741763  | 8.679511  | 4.276303 |
| C  | 1.463593  | 9.917866  | 4.317467 |
| C  | 0.741652  | 11.146861 | 4.160286 |
| C  | 1.449754  | 12.382056 | 4.024996 |
| C  | 2.870569  | 12.395225 | 4.115182 |
| C  | 3.597423  | 13.628393 | 3.955817 |
| C  | 5.034890  | 13.647928 | 3.990229 |
| C  | 5.750405  | 14.860077 | 3.777131 |
| C  | 7.177215  | 14.852912 | 3.793633 |
| C  | 7.894221  | 16.085010 | 3.689590 |
| C  | 7.955357  | 8.677948  | 4.416291 |
| C  | 7.397406  | 9.934535  | 4.698787 |
| C  | 7.955513  | 11.157526 | 4.295187 |
| C  | 7.188149  | 12.410782 | 4.270573 |
| C  | 5.744611  | 12.476601 | 4.398111 |
| C  | 4.922892  | 11.430758 | 4.979918 |
| C  | 3.563495  | 11.216431 | 4.542385 |
| C  | 2.882173  | 9.929454  | 4.562139 |
| C  | 3.563655  | 8.646098  | 4.663156 |
| C  | 2.870692  | 7.432112  | 4.349666 |
| C  | 2.885528  | 4.954484  | 4.247569 |
| C  | 3.597162  | 6.188830  | 4.309264 |
| C  | 5.034560  | 6.171373  | 4.346907 |
| C  | 5.743993  | 7.376308  | 4.641446 |
| C  | 7.188085  | 7.428203  | 4.511415 |
| C  | 4.923040  | 8.474662  | 5.118114 |
| C  | 7.888709  | 13.614757 | 3.936573 |
| Al | 5.909197  | 9.990843  | 5.869804 |
| Al | 4.685874  | 12.057196 | 6.974252 |
| Al | 7.138989  | 11.379052 | 8.215291 |
| Al | 7.143025  | 8.826191  | 8.332785 |
| Al | 4.692895  | 8.030164  | 7.162253 |
| Al | 4.722899  | 10.115666 | 8.600055 |

## v\_gp\_al6\_H2

|    |           |           |          |
|----|-----------|-----------|----------|
| C  | 7.891232  | 13.601729 | 3.918346 |
| C  | 9.320540  | 13.599024 | 3.787560 |
| C  | 10.034298 | 14.834642 | 3.696405 |
| C  | 9.320073  | 16.072909 | 3.669490 |
| C  | 7.896457  | 16.073924 | 3.681308 |
| C  | 7.180821  | 14.839555 | 3.771905 |
| C  | 7.187781  | 12.394997 | 4.253454 |
| C  | 7.959127  | 11.142348 | 4.312210 |
| C  | 9.341126  | 11.131673 | 3.939399 |
| C  | 10.040824 | 12.360433 | 3.772370 |
| C  | 7.405854  | 9.926148  | 4.744605 |
| C  | 7.962422  | 8.665504  | 4.451135 |
| C  | 9.342530  | 8.642000  | 4.073263 |
| C  | 10.043897 | 9.882237  | 3.906197 |
| C  | 7.193679  | 7.417446  | 4.530600 |
| C  | 7.891151  | 6.188282  | 4.305296 |
| C  | 9.323029  | 6.176261  | 4.164686 |
| C  | 10.041930 | 7.403115  | 4.028647 |
| C  | 5.738713  | 7.366167  | 4.637801 |
| C  | 5.035273  | 6.161422  | 4.317322 |
| C  | 5.752226  | 4.934003  | 4.231382 |
| C  | 7.178503  | 4.941311  | 4.263527 |
| C  | 3.600004  | 6.174728  | 4.272616 |
| C  | 2.886864  | 4.939815  | 4.219335 |
| C  | 3.604431  | 3.701878  | 4.245501 |
| C  | 5.030637  | 3.702814  | 4.232031 |
| C  | 1.458248  | 4.941728  | 4.247437 |
| C  | 0.744897  | 3.706533  | 4.337018 |
| C  | 1.457791  | 2.466571  | 4.380397 |
| C  | 2.888798  | 2.466923  | 4.357420 |
| C  | 2.872920  | 7.416004  | 4.330146 |
| C  | 1.450675  | 7.422062  | 4.250250 |
| C  | 0.742888  | 6.184512  | 4.247386 |
| C  | 3.568027  | 8.627520  | 4.651851 |
| C  | 2.885005  | 9.918463  | 4.558988 |
| C  | 1.466282  | 9.905239  | 4.318100 |
| C  | 0.744331  | 8.665891  | 4.275536 |
| C  | 3.564270  | 11.200188 | 4.547655 |
| C  | 2.873819  | 12.381237 | 4.119491 |
| C  | 1.453756  | 12.368494 | 4.029575 |
| C  | 0.744461  | 11.134636 | 4.166287 |
| C  | 4.926257  | 11.432299 | 4.989001 |
| C  | 5.748719  | 12.464127 | 4.368691 |
| C  | 5.038069  | 13.635487 | 3.960697 |
| C  | 3.599909  | 13.614910 | 3.947299 |
| C  | 5.751982  | 14.847368 | 3.747571 |
| C  | 4.928134  | 8.475556  | 5.080745 |
| C  | 10.034353 | 17.305445 | 3.589279 |
| C  | 0.746254  | 1.232369  | 4.500502 |
| Al | 5.887147  | 9.963030  | 5.889323 |
| Al | 4.685083  | 9.990079  | 8.429918 |
| Al | 4.612989  | 7.849201  | 7.133192 |
| Al | 6.937836  | 8.886439  | 8.472381 |
| Al | 7.026185  | 11.580107 | 8.309684 |
| Al | 4.977762  | 12.254228 | 6.890154 |
| H  | 8.519083  | 8.596047  | 8.521855 |
| H  | 4.150447  | 6.326622  | 7.218894 |

v\_gp\_al7

|    |           |           |           |
|----|-----------|-----------|-----------|
| C  | 10.021284 | 17.317016 | 4.872518  |
| C  | 9.309599  | 16.083025 | 4.867513  |
| C  | 10.024048 | 14.849763 | 4.842145  |
| C  | 9.312427  | 13.617276 | 4.836996  |
| C  | 7.882905  | 16.086662 | 4.854255  |
| C  | 7.171673  | 14.854067 | 4.830348  |
| C  | 7.882335  | 13.611591 | 4.913884  |
| C  | 5.749911  | 14.863481 | 4.765787  |
| C  | 7.180322  | 12.398438 | 5.147858  |
| C  | 5.723445  | 12.441148 | 5.161128  |
| C  | 5.033679  | 13.640613 | 4.835434  |
| C  | 3.608075  | 13.624387 | 4.765017  |
| C  | 4.945518  | 11.334303 | 5.540934  |
| C  | 3.583674  | 11.203562 | 5.232963  |
| C  | 2.887020  | 12.394556 | 4.866480  |
| C  | 1.469998  | 12.384517 | 4.799570  |
| C  | 0.767667  | 11.149123 | 4.878605  |
| C  | 1.488195  | 9.915366  | 5.000665  |
| C  | 2.889777  | 9.919959  | 5.275043  |
| C  | 0.767456  | 8.684509  | 4.898340  |
| C  | 1.474554  | 7.451208  | 4.857734  |
| C  | 0.770428  | 6.220484  | 4.752612  |
| C  | 2.882555  | 7.441404  | 5.030608  |
| C  | 3.562178  | 8.636993  | 5.414406  |
| C  | 3.608629  | 6.211014  | 4.947499  |
| C  | 2.902585  | 4.989606  | 4.761884  |
| C  | 1.479118  | 4.988526  | 4.720754  |
| C  | 0.765938  | 3.753593  | 4.715671  |
| C  | 1.475949  | 2.519855  | 4.688578  |
| C  | 0.762892  | 1.285716  | 4.741146  |
| C  | 2.900792  | 2.523881  | 4.674853  |
| C  | 3.614409  | 3.757655  | 4.703597  |
| C  | 5.037558  | 3.762271  | 4.744264  |
| C  | 5.750936  | 4.985821  | 4.876549  |
| C  | 5.037497  | 6.201683  | 5.043774  |
| C  | 7.172924  | 4.988220  | 4.927197  |
| C  | 7.880134  | 6.226410  | 5.054823  |
| C  | 9.308030  | 6.219723  | 4.921328  |
| C  | 10.023512 | 7.447644  | 4.850916  |
| C  | 10.029126 | 9.916166  | 4.843084  |
| C  | 9.328695  | 11.158822 | 4.900940  |
| C  | 10.028529 | 12.389092 | 4.791406  |
| C  | 7.943974  | 11.159547 | 5.228837  |
| C  | 5.729582  | 7.385433  | 5.439700  |
| C  | 4.919891  | 8.485822  | 5.896432  |
| C  | 7.181019  | 7.440681  | 5.336492  |
| C  | 7.945767  | 8.684655  | 5.325079  |
| C  | 7.376963  | 9.933446  | 5.645495  |
| C  | 9.323766  | 8.677617  | 4.956234  |
| Al | 5.783135  | 10.073671 | 6.690347  |
| Al | 4.765423  | 10.624088 | 9.240617  |
| Al | 4.379009  | 8.208161  | 7.941200  |
| Al | 3.684796  | 8.492092  | 10.364603 |
| Al | 6.254739  | 9.294947  | 11.338653 |
| Al | 5.997913  | 7.102289  | 9.877564  |
| Al | 7.190593  | 9.589364  | 9.011520  |

## v\_gp\_al7\_H2

|    |           |           |           |
|----|-----------|-----------|-----------|
| C  | 9.474162  | 8.771688  | 4.975263  |
| C  | 10.171436 | 7.541892  | 4.866968  |
| C  | 9.455529  | 6.313064  | 4.926262  |
| C  | 8.027225  | 6.317415  | 5.042244  |
| C  | 7.331092  | 7.530518  | 5.320032  |
| C  | 8.099116  | 8.772642  | 5.350845  |
| C  | 5.880602  | 7.480046  | 5.380072  |
| C  | 5.186591  | 6.295318  | 4.992967  |
| C  | 5.898548  | 5.074727  | 4.857176  |
| C  | 7.319160  | 5.078117  | 4.921682  |
| C  | 3.757235  | 6.309100  | 4.896248  |
| C  | 3.049355  | 5.084102  | 4.735628  |
| C  | 3.761443  | 3.850004  | 4.713174  |
| C  | 5.184081  | 3.849176  | 4.763923  |
| C  | 1.624871  | 5.083984  | 4.717320  |
| C  | 0.912794  | 6.315455  | 4.768312  |
| C  | 1.616935  | 7.546487  | 4.857413  |
| C  | 3.029479  | 7.538670  | 4.991869  |
| C  | 3.710276  | 8.730650  | 5.387275  |
| C  | 3.028045  | 10.016581 | 5.325260  |
| C  | 1.629325  | 10.011966 | 5.045821  |
| C  | 0.910205  | 8.779035  | 4.922813  |
| C  | 3.723218  | 11.301959 | 5.332897  |
| C  | 3.031542  | 12.492128 | 4.963103  |
| C  | 1.616674  | 12.481738 | 4.863380  |
| C  | 0.912098  | 11.246562 | 4.925786  |
| C  | 3.753906  | 13.719098 | 4.856867  |
| C  | 5.179112  | 13.729183 | 4.937819  |
| C  | 5.864308  | 12.530087 | 5.288461  |
| C  | 5.079852  | 11.426197 | 5.674878  |
| C  | 5.894639  | 14.949383 | 4.835165  |
| C  | 7.316175  | 14.942125 | 4.897872  |
| C  | 8.023422  | 13.697584 | 5.000735  |
| C  | 7.324373  | 12.485227 | 5.255351  |
| C  | 9.454559  | 13.708075 | 4.900684  |
| C  | 10.166584 | 14.941738 | 4.883798  |
| C  | 9.454235  | 16.176433 | 4.899453  |
| C  | 8.028992  | 16.175495 | 4.883155  |
| C  | 8.094342  | 11.244087 | 5.311266  |
| C  | 9.473122  | 11.250912 | 4.956135  |
| C  | 10.171419 | 12.480987 | 4.844166  |
| C  | 5.072120  | 8.582845  | 5.823353  |
| C  | 3.048272  | 2.616487  | 4.723686  |
| C  | 1.624039  | 2.615428  | 4.720077  |
| C  | 0.912637  | 3.849726  | 4.731097  |
| C  | 7.538537  | 10.009882 | 5.713206  |
| C  | 10.176122 | 10.011274 | 4.873055  |
| C  | 10.167337 | 17.410725 | 4.893792  |
| C  | 0.911188  | 1.382513  | 4.782116  |
| Al | 5.937976  | 10.097805 | 6.731015  |
| Al | 4.638790  | 8.061269  | 7.809044  |
| Al | 3.150770  | 7.331199  | 9.814662  |
| Al | 5.898880  | 7.715738  | 10.255144 |
| Al | 4.359139  | 9.421342  | 11.696429 |
| Al | 2.863088  | 9.883476  | 9.692787  |
| Al | 5.538414  | 10.108730 | 9.362848  |
| H  | 4.610903  | 6.527009  | 10.462723 |
| H  | 5.587847  | 8.190441  | 11.989607 |

v\_gp\_al8

|    |          |           |           |
|----|----------|-----------|-----------|
| C  | 5.617800 | 12.582528 | 5.060335  |
| C  | 4.935869 | 13.775529 | 4.667406  |
| C  | 5.656361 | 14.996609 | 4.565429  |
| C  | 7.079816 | 14.987263 | 4.651857  |
| C  | 7.789785 | 13.748062 | 4.796769  |
| C  | 7.085227 | 12.533810 | 5.074907  |
| C  | 9.220814 | 13.755586 | 4.719207  |
| C  | 9.932173 | 14.992433 | 4.678237  |
| C  | 9.221022 | 16.222467 | 4.655635  |
| C  | 7.796226 | 16.222940 | 4.623788  |
| C  | 7.853462 | 11.313740 | 5.200762  |
| C  | 9.232924 | 11.296644 | 4.841765  |
| C  | 9.937255 | 12.525292 | 4.699131  |
| C  | 9.934126 | 17.456642 | 4.633983  |
| C  | 3.508235 | 13.761134 | 4.557785  |
| C  | 2.781228 | 12.530711 | 4.660733  |
| C  | 1.365418 | 12.517768 | 4.544991  |
| C  | 0.660182 | 11.280119 | 4.625297  |
| C  | 1.378161 | 10.046610 | 4.776590  |
| C  | 2.779532 | 10.048501 | 5.063294  |
| C  | 3.470350 | 11.343337 | 5.056402  |
| C  | 0.657028 | 8.810725  | 4.685898  |
| C  | 1.364997 | 7.575234  | 4.664364  |
| C  | 2.779435 | 7.569703  | 4.816981  |
| C  | 3.453342 | 8.772225  | 5.183098  |
| C  | 0.660322 | 6.337202  | 4.592183  |
| C  | 1.371240 | 5.104799  | 4.571355  |
| C  | 2.800200 | 5.103962  | 4.596477  |
| C  | 3.507686 | 6.331962  | 4.740379  |
| C  | 3.514634 | 3.867559  | 4.581036  |
| C  | 4.943516 | 3.868042  | 4.638766  |
| C  | 5.656839 | 5.096452  | 4.721022  |
| C  | 4.937632 | 6.315834  | 4.826798  |
| C  | 7.085238 | 5.101189  | 4.802399  |
| C  | 7.794584 | 6.338558  | 4.913894  |
| C  | 7.085204 | 7.565198  | 5.172165  |
| C  | 5.627980 | 7.514551  | 5.212068  |
| C  | 9.220521 | 6.333539  | 4.811385  |
| C  | 9.938992 | 7.568426  | 4.737975  |
| C  | 9.241242 | 8.800125  | 4.846162  |
| C  | 7.857678 | 8.800049  | 5.227263  |
| C  | 2.798137 | 2.632056  | 4.584331  |
| C  | 1.371302 | 2.629813  | 4.570257  |
| C  | 0.657821 | 3.867080  | 4.584562  |
| C  | 4.815374 | 11.491893 | 5.429781  |
| C  | 9.941196 | 10.046288 | 4.765899  |
| C  | 7.321393 | 10.059682 | 5.695910  |
| C  | 4.804624 | 8.606535  | 5.678604  |
| C  | 0.658068 | 1.392566  | 4.616081  |
| Al | 5.561341 | 10.193460 | 6.561921  |
| Al | 5.707439 | 9.926034  | 9.261202  |
| Al | 8.247236 | 8.953107  | 10.168295 |
| Al | 6.171075 | 9.098901  | 11.696348 |
| Al | 5.290768 | 7.230659  | 10.151248 |
| Al | 7.493422 | 6.860517  | 8.790970  |
| Al | 7.755607 | 9.363505  | 7.644029  |
| Al | 5.186301 | 7.874675  | 7.628719  |



v\_gp\_al8\_H2

|    |          |           |           |
|----|----------|-----------|-----------|
| C  | 9.241350 | 6.376548  | 4.745438  |
| C  | 7.817591 | 6.383027  | 4.840570  |
| C  | 7.107070 | 7.611432  | 5.079048  |
| C  | 7.879908 | 8.844102  | 5.130902  |
| C  | 9.261564 | 8.841214  | 4.758066  |
| C  | 9.960360 | 7.608940  | 4.662300  |
| C  | 7.343076 | 10.113012 | 5.591041  |
| C  | 7.876428 | 11.362139 | 5.069541  |
| C  | 9.257350 | 11.337674 | 4.719165  |
| C  | 9.965041 | 10.089211 | 4.667391  |
| C  | 7.104733 | 12.575391 | 4.909532  |
| C  | 7.812367 | 13.787731 | 4.613869  |
| C  | 9.240995 | 13.793604 | 4.544362  |
| C  | 9.960779 | 12.564476 | 4.549712  |
| C  | 5.640477 | 12.628390 | 4.881196  |
| C  | 4.960360 | 13.814161 | 4.464314  |
| C  | 5.681825 | 15.033528 | 4.345864  |
| C  | 7.104534 | 15.022680 | 4.441825  |
| C  | 3.535628 | 13.797494 | 4.339325  |
| C  | 2.804044 | 12.571699 | 4.450609  |
| C  | 3.489790 | 11.389375 | 4.867936  |
| C  | 4.829046 | 11.543049 | 5.250984  |
| C  | 1.391664 | 12.558143 | 4.324925  |
| C  | 0.685811 | 11.319277 | 4.414466  |
| C  | 1.403482 | 10.089809 | 4.588661  |
| C  | 2.800527 | 10.095682 | 4.889001  |
| C  | 0.683127 | 8.853236  | 4.512055  |
| C  | 1.392079 | 7.617671  | 4.513349  |
| C  | 2.804950 | 7.611755  | 4.673583  |
| C  | 3.477730 | 8.820894  | 5.028384  |
| C  | 3.534726 | 6.377506  | 4.622453  |
| C  | 4.962044 | 6.361946  | 4.725519  |
| C  | 5.648720 | 7.565919  | 5.097100  |
| C  | 4.828416 | 8.669735  | 5.515910  |
| C  | 0.686356 | 6.381102  | 4.457262  |
| C  | 1.400861 | 5.146935  | 4.461530  |
| C  | 2.826460 | 5.145125  | 4.493858  |
| C  | 3.542928 | 3.909793  | 4.508249  |
| C  | 4.968538 | 3.909446  | 4.579325  |
| C  | 5.683371 | 5.140321  | 4.647797  |
| C  | 7.106988 | 5.144294  | 4.740423  |
| C  | 9.955771 | 15.028067 | 4.486010  |
| C  | 9.243502 | 16.259495 | 4.437228  |
| C  | 7.821093 | 16.258458 | 4.396045  |
| C  | 2.826237 | 2.674498  | 4.527533  |
| C  | 1.400635 | 2.673593  | 4.502362  |
| C  | 0.685651 | 3.910330  | 4.495157  |
| C  | 9.958434 | 17.491532 | 4.400061  |
| C  | 0.684731 | 1.437702  | 4.561898  |
| Al | 5.562466 | 10.259520 | 6.399415  |
| Al | 5.637267 | 10.133692 | 9.111879  |
| Al | 8.195770 | 9.292501  | 10.032421 |
| Al | 5.816507 | 8.246449  | 10.808734 |
| Al | 5.184717 | 6.162866  | 9.351250  |
| Al | 7.542711 | 7.087206  | 8.747949  |
| Al | 7.818864 | 9.512648  | 7.521476  |
| Al | 5.152008 | 7.995171  | 7.523961  |
| H  | 5.925428 | 8.362161  | 12.401456 |
| H  | 4.331650 | 4.814595  | 9.455764  |



## v\_gp\_all3

|    |          |           |          |
|----|----------|-----------|----------|
| C  | 4.863771 | 13.731371 | 1.829818 |
| C  | 5.608157 | 12.542460 | 2.080120 |
| C  | 7.026913 | 12.479037 | 1.747271 |
| C  | 7.670642 | 13.679126 | 1.338292 |
| C  | 6.955947 | 14.925656 | 1.335679 |
| C  | 5.548760 | 14.944095 | 1.543392 |
| C  | 9.061402 | 13.670763 | 0.976977 |
| C  | 9.760963 | 12.440021 | 0.828589 |
| C  | 9.089181 | 11.213997 | 1.097411 |
| C  | 7.788657 | 11.231784 | 1.685095 |
| C  | 7.656889 | 16.153383 | 1.146602 |
| C  | 9.058945 | 16.141313 | 0.896019 |
| C  | 9.756651 | 14.903719 | 0.793576 |
| C  | 4.913785 | 11.466616 | 2.687348 |
| C  | 9.766068 | 9.964612  | 0.928389 |
| C  | 9.089977 | 8.731598  | 1.201855 |
| C  | 7.798857 | 8.763738  | 1.815346 |
| C  | 7.043463 | 7.518501  | 2.004309 |
| C  | 7.680168 | 6.289317  | 1.645482 |
| C  | 9.063301 | 6.269651  | 1.263324 |
| C  | 9.761475 | 7.491271  | 1.022658 |
| C  | 5.648387 | 7.474297  | 2.383254 |
| C  | 4.885296 | 6.286571  | 2.179270 |
| C  | 5.556542 | 5.056781  | 1.935282 |
| C  | 6.965211 | 5.049148  | 1.721398 |
| C  | 3.461807 | 6.312001  | 2.364824 |
| C  | 2.733641 | 5.088290  | 2.373333 |
| C  | 3.427839 | 3.845613  | 2.247776 |
| C  | 4.834290 | 3.833715  | 2.020756 |
| C  | 2.766083 | 7.553947  | 2.551728 |
| C  | 1.345611 | 7.570003  | 2.677126 |
| C  | 0.633729 | 6.340485  | 2.750561 |
| C  | 1.324488 | 5.099381  | 2.611991 |
| C  | 3.520357 | 8.739920  | 2.804453 |
| C  | 2.835417 | 10.044885 | 2.875656 |
| C  | 1.375060 | 10.044564 | 2.801998 |
| C  | 0.650744 | 8.809298  | 2.833794 |
| C  | 0.651022 | 11.282164 | 2.742250 |
| C  | 1.340124 | 12.512116 | 2.489952 |
| C  | 2.753506 | 12.514915 | 2.320297 |
| C  | 3.522284 | 11.345999 | 2.624880 |
| C  | 2.724007 | 2.616557  | 2.433242 |
| C  | 1.322099 | 2.627795  | 2.694953 |
| C  | 0.623379 | 3.867667  | 2.791437 |
| C  | 4.945220 | 8.581134  | 3.011866 |
| C  | 7.293717 | 10.014785 | 2.204465 |
| C  | 3.444369 | 13.730966 | 2.024611 |
| C  | 0.628110 | 1.397047  | 2.931128 |
| C  | 9.758095 | 17.372082 | 0.708261 |
| AI | 5.975862 | 10.164108 | 3.578939 |
| AI | 4.935103 | 8.085985  | 5.046884 |
| AI | 2.914021 | 8.091512  | 6.709031 |
| AI | 4.179355 | 9.109980  | 8.740386 |
| AI | 6.619280 | 10.586019 | 8.520942 |
| AI | 7.267817 | 10.270691 | 5.931510 |
| AI | 6.202967 | 8.156327  | 7.368799 |
| AI | 4.686218 | 10.325709 | 6.433542 |
| AI | 5.951579 | 12.665290 | 6.711690 |
| AI | 4.178744 | 11.811397 | 8.716769 |
| AI | 2.078198 | 10.494088 | 7.793456 |
| AI | 2.454965 | 10.238679 | 5.113647 |

|              |          |           |           |
|--------------|----------|-----------|-----------|
| Al           | 3.237218 | 12.595142 | 6.249642  |
| v_gp_all3_H2 |          |           |           |
| C            | 3.288584 | 13.917422 | 4.760728  |
| C            | 4.721509 | 13.931427 | 4.836316  |
| C            | 5.407748 | 12.724930 | 5.176831  |
| C            | 4.611346 | 11.621876 | 5.519578  |
| C            | 3.255564 | 11.485597 | 5.183277  |
| C            | 2.557307 | 12.684847 | 4.842185  |
| C            | 6.878128 | 12.677723 | 5.187594  |
| C            | 7.580116 | 13.902799 | 4.922417  |
| C            | 6.868998 | 15.147729 | 4.815102  |
| C            | 5.439749 | 15.158263 | 4.759412  |
| C            | 9.012042 | 13.912443 | 4.826748  |
| C            | 9.731395 | 12.681662 | 4.791589  |
| C            | 9.032109 | 11.448973 | 4.942777  |
| C            | 7.652869 | 11.459533 | 5.309183  |
| C            | 9.723479 | 15.153510 | 4.795487  |
| C            | 9.012637 | 16.386614 | 4.808107  |
| C            | 7.584047 | 16.388242 | 4.798834  |
| C            | 7.137429 | 10.196091 | 5.837442  |
| C            | 7.649429 | 8.937879  | 5.330222  |
| C            | 9.028601 | 8.946597  | 4.944655  |
| C            | 9.738179 | 10.196670 | 4.872013  |
| C            | 6.874686 | 7.709920  | 5.252003  |
| C            | 7.580596 | 6.486221  | 4.961306  |
| C            | 9.009506 | 6.480521  | 4.845408  |
| C            | 9.727988 | 7.716757  | 4.799384  |
| C            | 6.871695 | 5.245643  | 4.843348  |
| C            | 5.441646 | 5.241868  | 4.798400  |
| C            | 4.726855 | 6.463281  | 4.943788  |
| C            | 5.423785 | 7.654115  | 5.328841  |
| C            | 3.288284 | 6.473398  | 4.872561  |
| C            | 2.556348 | 7.710519  | 4.942140  |
| C            | 3.234961 | 8.909416  | 5.312751  |
| C            | 4.587810 | 8.723990  | 5.837754  |
| C            | 2.578483 | 5.245610  | 4.725460  |
| C            | 3.294158 | 4.008014  | 4.684001  |
| C            | 4.724985 | 4.010680  | 4.711953  |
| C            | 1.139135 | 7.720967  | 4.790596  |
| C            | 0.434667 | 6.481382  | 4.725426  |
| C            | 1.147098 | 5.246822  | 4.705629  |
| C            | 0.433336 | 4.006793  | 4.725082  |
| C            | 1.147048 | 2.768211  | 4.683296  |
| C            | 2.577455 | 2.770015  | 4.670668  |
| C            | 2.564589 | 10.188537 | 5.193623  |
| C            | 1.153838 | 10.192290 | 4.924967  |
| C            | 0.430793 | 8.957770  | 4.827661  |
| C            | 1.137601 | 12.675363 | 4.762202  |
| C            | 0.433287 | 11.431954 | 4.817218  |
| C            | 9.725489 | 17.625254 | 4.800160  |
| C            | 0.428356 | 1.530295  | 4.711935  |
| Al           | 5.360849 | 10.326890 | 6.657112  |
| Al           | 4.149524 | 12.391142 | 9.665055  |
| Al           | 2.822004 | 10.221540 | 8.955873  |
| Al           | 3.754046 | 10.419657 | 11.562163 |
| Al           | 6.071931 | 11.771619 | 11.558110 |
| Al           | 6.701065 | 12.464824 | 8.949773  |
| Al           | 5.468982 | 10.117972 | 9.378250  |
| Al           | 6.786572 | 7.860877  | 8.952563  |
| Al           | 7.772886 | 10.132419 | 7.846931  |
| Al           | 8.086953 | 10.474544 | 10.427533 |
| Al           | 6.223628 | 8.794796  | 11.613636 |

|    |          |          |           |
|----|----------|----------|-----------|
| Al | 3.837494 | 8.034425 | 10.422392 |
| Al | 4.332015 | 8.135153 | 7.846109  |
| H  | 6.636824 | 8.078596 | 12.974740 |
| H  | 7.010589 | 7.425399 | 10.562283 |
